# Supplementary figures and images for: Genome-Wide Association Study SNPs in the Human Genome Diversity Project Populations: Does Selection Affect Unlinked SNPs with Shared Trait Associations?
Source: PLOS journal article supplement (doi:10.1371/journal.pgen.1001266), 2011-01-06

**A.**


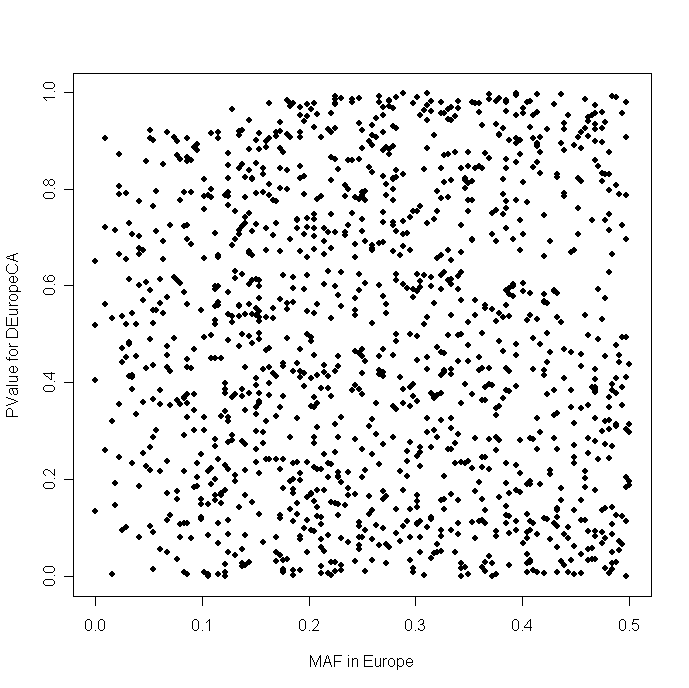


**B.**

**
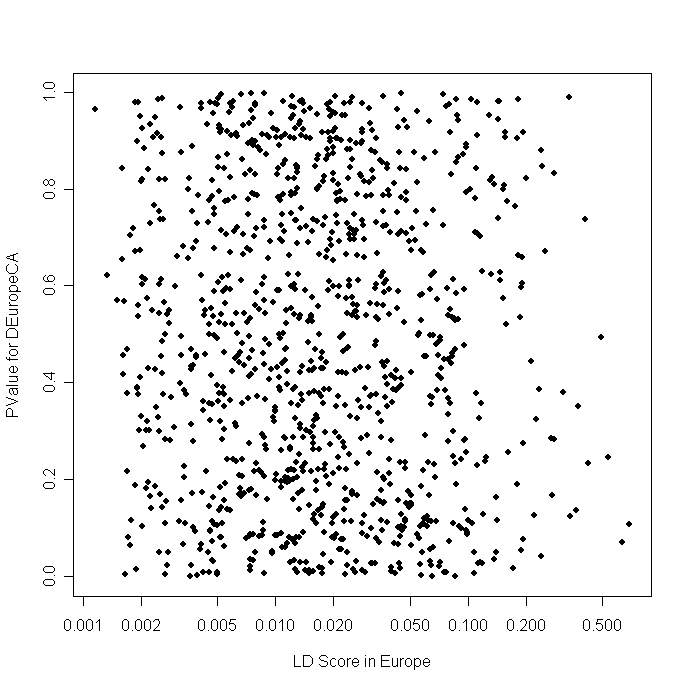
**

**C.**


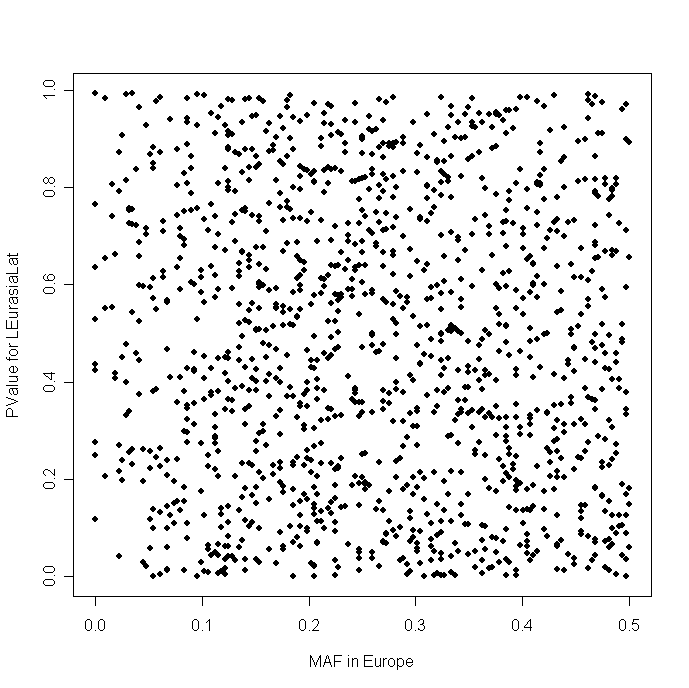


**D.**

**
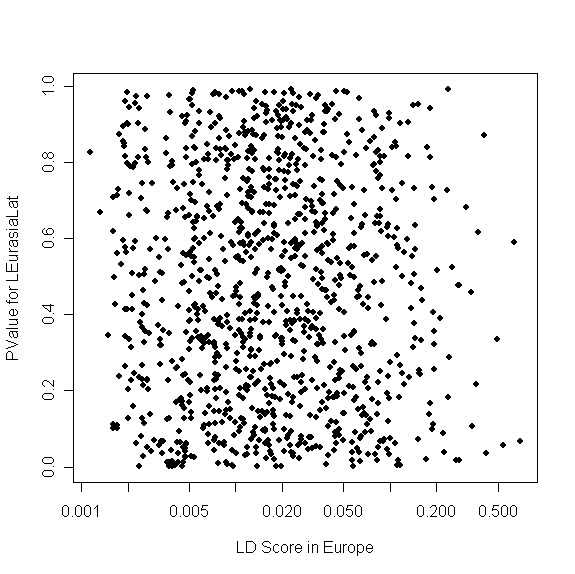
**

**Figure S9**

Supplement: S9 (10.1371/journal.pgen.1001266.s009) [file journal.pgen.1001266.s009]
